# Supplementary material for: Assessment tools and incidence of hospital-associated disability in older adults: a rapid systematic review
Source: PeerJ journal article supplement (doi:10.7717/peerj.16036), 2023-10-19
Supplement: FigS2_83733_JT_staff.pdf [file FigS2_83733_JT_staff.pdf]

# JBI – Checklist study ratings

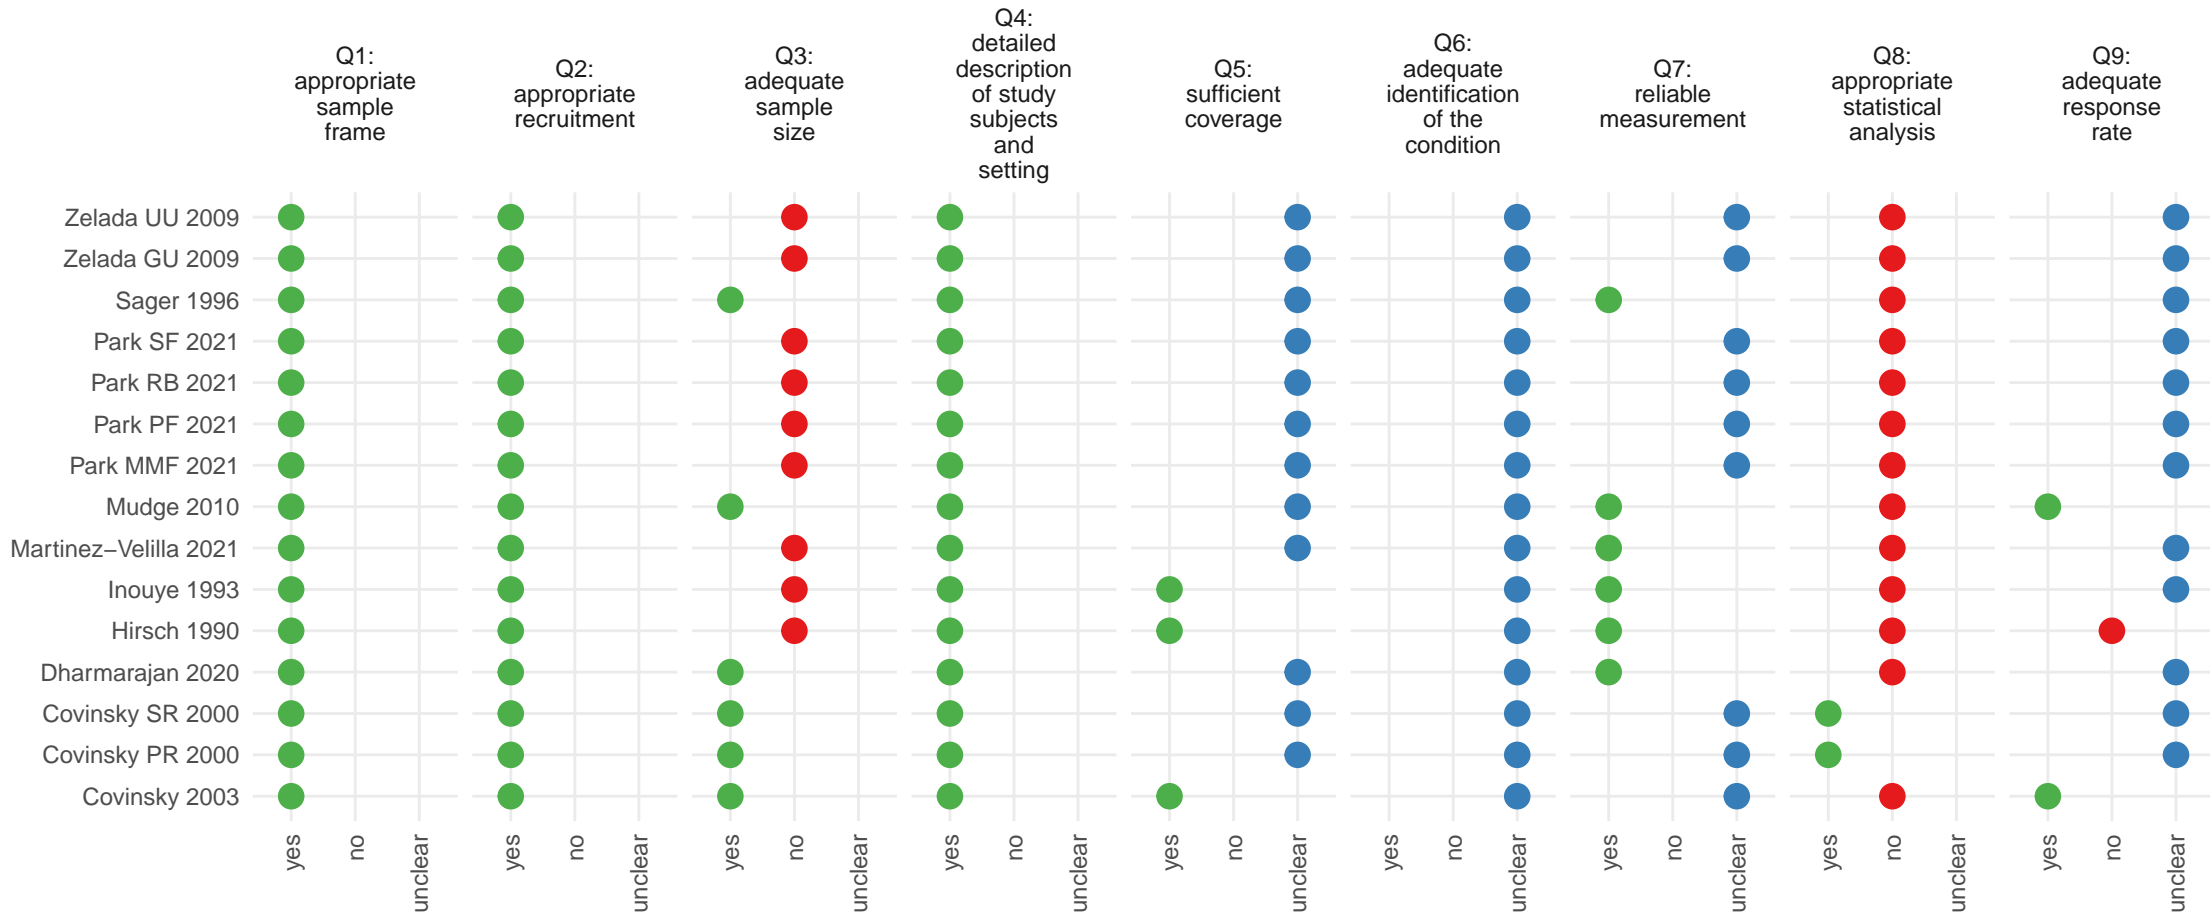

Rating ● yes ● no ● unclear
